# Supplementary material for: Kinetic exploration supplemented by spectroscopic and molecular docking analysis in search of the optimal conditions for effective degradation of malachite green
Source: Royal Society of Chemistry journal article supplement (doi:10.1039/c5ra04724b), 2015-01-01
Supplement: c5ra04724b1.pdf [file c5ra04724b1.pdf]

## **Supporting Information**

# **Kinetic exploration appended by Spectroscopic and Molecular Docking analysis in search of an optimal condition for effective degradation of Malachite Green**

Somnath Dasmandal<sup>a</sup>, Harasit Kumar Mandal<sup>a</sup>, Suparna Rudra<sup>a</sup>, Arjama Kundu<sup>a</sup>, Tapas Majumdar<sup>b</sup> and Ambikesh Mahapatra<sup>a,\*</sup>

*<sup>a</sup>Department of Chemistry, Jadavpur University, Kolkata 700 032, India*

*<sup>b</sup>Department of Chemistry, University of Kalyani, Kalyani 741235, India*

\*Corresponding author. Tel.: +9133 2457 2770 (office), +9133 2432 4586 (residence); fax: +9133 2414 6223.

E-mail addresses [amahapatra@chemistry.jdvu.ac.in](mailto:amahapatra@chemistry.jdvu.ac.in), [ambikeshju@gmail.com](mailto:ambikeshju@gmail.com)

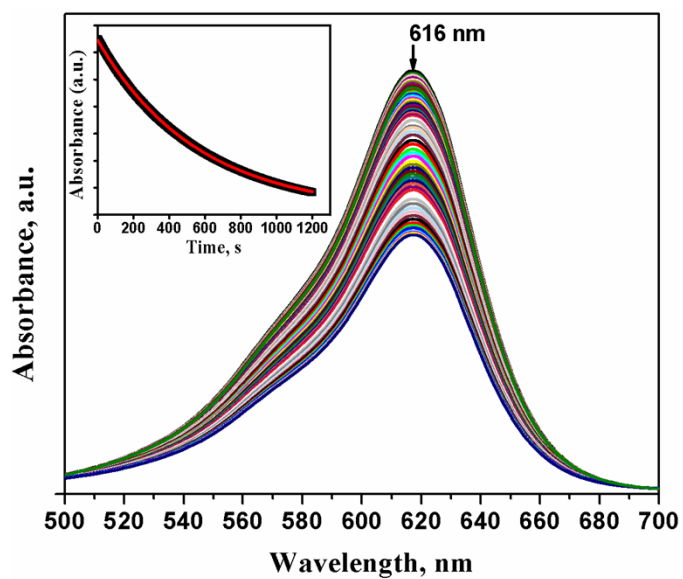

**Fig. S1** UV-Vis Spectra of MG and  $^-OH$  reaction mixture at different time intervals  
(Inset: Change of absorbance as a function of time at 616 nm)  
[MG] $_0$  =  $1.25 \times 10^{-5}$  M, [ $^-OH$ ] $_0$  = 1.875 mM,  $\mu$  = 5.0 mM at 298 K

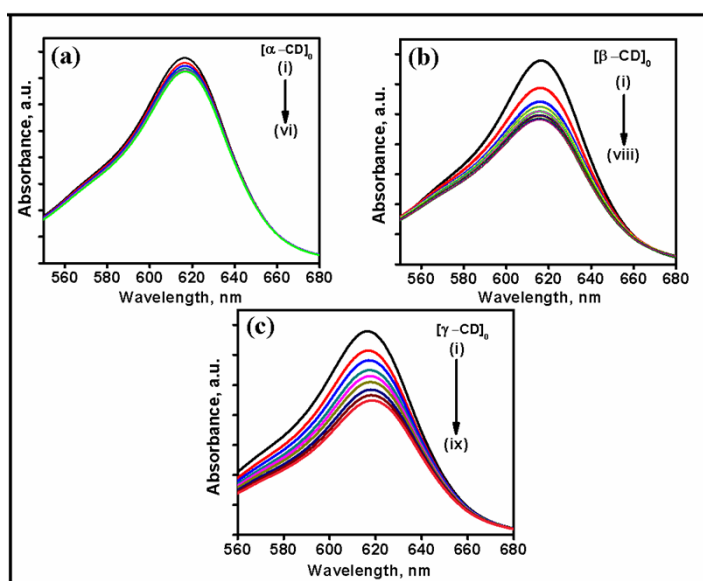

**Fig.S2:** Spectral change of MG upon addition of CDs. (a):  $[\alpha-CD]_0$  = (i) 0.0 to (vi) 5.0 mM, (b)  $[\beta-CD]_0$  = (i) 0.0 to (viii) 6.0 mM and  $[\gamma-CD]_0$  = (i) 0.0 to (ix) 7.0 mM.

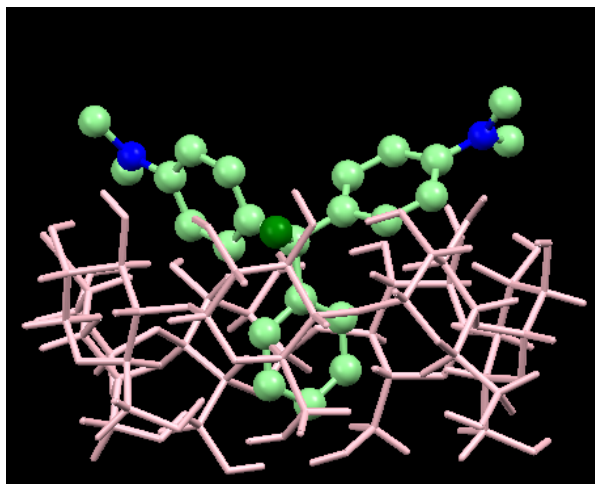

**Fig.S3:** Molecular modeling of MG-  $\beta$ -CD 1: 1 complex; MG and  $\beta$ -CD have been depicted in the ball stick and capped stick model respectively.
